# Supplementary material for: Phthalate Exposure and Allergy in the U.S. Population: Results from NHANES 2005–2006
Source: PubMed Central journal article supplement (PMC3801456; doi:10.1289/ehp.1206211), 2013-06-25
Supplement: ehp.1206211.s001.pdf [file ehp.1206211.s001.pdf]

**Supplemental Material**

**Phthalate Exposure and Allergy in the U.S. Population: Results from  
NHANES 2005-2006**

Jane A. Hoppin, Renee Jaramillo, Stephanie J. London, Randi J. Bertelsen, Päivi M. Salo, Dale P. Sandler, and Darryl C. Zeldin

**Supplemental Material, Table S1.** Urinary Phthalate Concentration (ng/mL) - Survey Weighted Summary Statistics, Children (age 6-17): N=779

|       | Phthalate                              | LOD | Pct > LOD | Geo Mean | SE Geo Mean | 5th pctl | 25th pctl | 50th pctl | 75th pctl | 95th pctl |
|-------|----------------------------------------|-----|-----------|----------|-------------|----------|-----------|-----------|-----------|-----------|
|       | Low Molecular Weight                   |     |           | 151.18   | 4.65        | 26.10    | 69.59     | 136.81    | 303.69    | 1217.34   |
| MnBP  | Mono-n-butyl phthalate                 | 0.6 | 99.7      | 29.09    | 1.35        | 4.98     | 15.80     | 31.56     | 57.63     | 134.95    |
| MEP   | Mono-ethyl phthalate                   | 0.5 | 100.0     | 85.52    | 4.02        | 11.56    | 32.64     | 71.03     | 212.76    | 1050.90   |
| MiBP  | Mono-isobutyl phthalate                | 0.3 | 99.6      | 8.15     | 0.40        | 1.14     | 4.07      | 8.93      | 16.38     | 45.97     |
| MMP   | Mono-n-methyl phthalate                | 1.1 | 46.5      | 1.83     | 0.09        | < LOD    | < LOD     | < LOD     | 3.86      | 15.74     |
|       | High Molecular Weight                  |     |           | 175.08   | 9.10        | 27.94    | 87.08     | 170.63    | 322.93    | 1149.91   |
| MBzP  | Mono-benzyl phthalate                  | 0.2 | 99.4      | 16.82    | 0.92        | 2.42     | 7.69      | 17.98     | 37.79     | 106.75    |
| MCOP  | Mono(carboxyoctyl) phthalate           | 0.7 | 98.0      | 7.42     | 0.49        | 1.14     | 3.95      | 7.23      | 13.46     | 49.58     |
| MCNP  | Mono(carboxynonyl) phthalate           | 0.6 | 94.2      | 3.75     | 0.23        | < LOD    | 2.11      | 3.90      | 6.98      | 18.94     |
| MCPP  | Mono-(3-carboxypropyl) phthalate       | 0.2 | 99.3      | 3.89     | 0.27        | 0.63     | 2.03      | 4.09      | 7.67      | 17.91     |
| MCHP  | Mono-cyclohexyl Phthalate              | 0.6 | 2.0       | 0.44     | 0.01        | < LOD    | < LOD     | < LOD     | < LOD     | < LOD     |
| MiNP  | Mono-isononyl phthalate                | 1.2 | 14.5      | 1.05     | 0.03        | < LOD    | < LOD     | < LOD     | < LOD     | 3.16      |
| MOP   | Mono-n-octyl phthalate                 | 1.8 | 1.0       | 1.32     | 0.01        | < LOD    | < LOD     | < LOD     | < LOD     | < LOD     |
|       | ∑Diethylhexyl phthalate (DEHP)         |     |           | 118.44   | 7.04        | 15.36    | 54.15     | 114.57    | 230.02    | 965.48    |
| MEHP  | Mono-(2-ethyl)-hexyl phthalate         | 1.2 | 72.2      | 3.27     | 0.20        | < LOD    | < LOD     | 2.80      | 6.74      | 32.73     |
| MECPP | Mono-2-ethyl-5-carboxypentyl phthalate | 0.6 | 100.0     | 54.81    | 3.27        | 7.14     | 25.29     | 51.41     | 101.93    | 468.39    |
| MEHHP | Mono-(2-ethyl-5-hydroxyhexyl)          | 0.7 | 99.9      | 34.55    | 2.15        | 4.10     | 15.16     | 33.43     | 74.70     | 288.06    |
| MEOHP | Mono-(2-ethyl-5-oxohexyl)              | 0.7 | 99.8      | 22.88    | 1.38        | 2.69     | 10.95     | 22.50     | 46.08     | 185.23    |

Below Detection Fill Values Included: Fill Value = Lower LOD / sqrt(2) imputed values were used for calculation of geometric mean and SE.

Limited to participants with all covariates in logistic regression model: phthalates, age, race/ethnicity, gender, cotinine, BMI, creatinine

**Supplemental Material, Table S2.** NHANES 2005-06: Urinary Phthalate Concentrations (ng/mL) - Survey Weighted Summary  
 Statistics, Adults age 18+: N=1546

|       | Phthalate                              | LOD | Pct > LOD | Geo Mean | SE Geo Mean | 5th pctl | 25th pctl | 50th pctl | 75th pctl | 95th pctl |
|-------|----------------------------------------|-----|-----------|----------|-------------|----------|-----------|-----------|-----------|-----------|
|       | Low Molecular Weight                   |     |           |          |             |          |           |           |           |           |
| MnBP  | Mono-n-butyl phthalate                 | 0.6 | 99.5      | 17.99    | 0.88        | 2.66     | 9.42      | 18.58     | 36.85     | 101.08    |
| MEP   | Mono-ethyl phthalate                   | 0.5 | 99.5      | 114.97   | 7.79        | 12.11    | 40.23     | 108.36    | 304.04    | 1501.59   |
| MiBP  | Mono-isobutyl phthalate                | 0.3 | 96.6      | 4.72     | 0.31        | 0.39     | 2.31      | 5.42      | 10.53     | 28.98     |
| MMP   | Mono-n-methyl phthalate                | 1.1 | 36.2      | 1.44     | 0.07        | < LOD    | < LOD     | < LOD     | 2.24      | 12.23     |
|       | High Molecular Weight                  |     |           |          |             |          |           |           |           |           |
| MBzP  | Mono-benzyl phthalate                  | 0.2 | 98.2      | 7.08     | 0.46        | 0.57     | 3.18      | 7.57      | 17.37     | 57.37     |
| MCOP  | Mono(carboxyoctyl) phthalate           | 0.7 | 94.5      | 5.00     | 0.36        | < LOD    | 2.14      | 4.51      | 9.97      | 52.79     |
| MCNP  | Mono(carboxynonyl) phthalate           | 0.6 | 88.9      | 2.53     | 0.12        | < LOD    | 1.19      | 2.41      | 4.70      | 17.00     |
| MCPP  | Mono-(3-carboxypropyl) phthalate       | 0.2 | 95.4      | 1.78     | 0.08        | 0.17     | 0.87      | 1.74      | 3.59      | 11.26     |
| MCHP  | Mono-cyclohexyl Phthalate              | 0.6 | 2.2       | 0.44     | 0.00        | < LOD    | < LOD     | < LOD     | < LOD     | < LOD     |
| MiNP  | Mono-isononyl phthalate                | 1.2 | 12.7      | 1.05     | 0.02        | < LOD    | < LOD     | < LOD     | < LOD     | 3.63      |
| MOP   | Mono-n-octyl phthalate                 | 1.8 | 1.1       | 1.32     | 0.00        | < LOD    | < LOD     | < LOD     | < LOD     | < LOD     |
|       | ∑Diethylhexyl phthalate (DEHP)         |     |           | 79.85    | 4.00        | 10.98    | 33.23     | 71.01     | 160.81    | 918.31    |
| MEHP  | Mono-(2-ethyl)-hexyl phthalate         | 1.2 | 65.4      | 2.96     | 0.13        | < LOD    | < LOD     | 2.25      | 6.19      | 41.72     |
| MECPP | Mono-2-ethyl-5-carboxypentyl phthalate | 0.6 | 100.0     | 35.52    | 1.87        | 4.69     | 15.29     | 31.18     | 74.83     | 379.07    |
| MEHHP | Mono-(2-ethyl-5-hydroxyhexyl)          | 0.7 | 99.8      | 23.76    | 1.18        | 2.70     | 9.59      | 21.40     | 50.46     | 311.00    |
| MEOHP | Mono-(2-ethyl-5-oxohexyl)              | 0.7 | 98.7      | 15.01    | 0.78        | 1.76     | 6.10      | 13.48     | 33.02     | 183.53    |

Below Detection Fill Values Included: Fill Value = Lower LOD / sqrt(2); imputed values were used for calculation of geometric mean and SE.

Limited to participants with all covariates in logistic regression model: phthalates, age, race/ethnicity, gender, cotinine, BMI, creatinine
